# Supplementary material
Source: Springer Nature journal article supplement (https://www.springermedizin.de/resource/supplementary/12889_2013_6632_MOESM6_ESM.pdf/9498648)

**Figure 3: Proportions of Studied Determinants of Communication Inequalities during the H1N1 Pandemic in Population-based Studies**

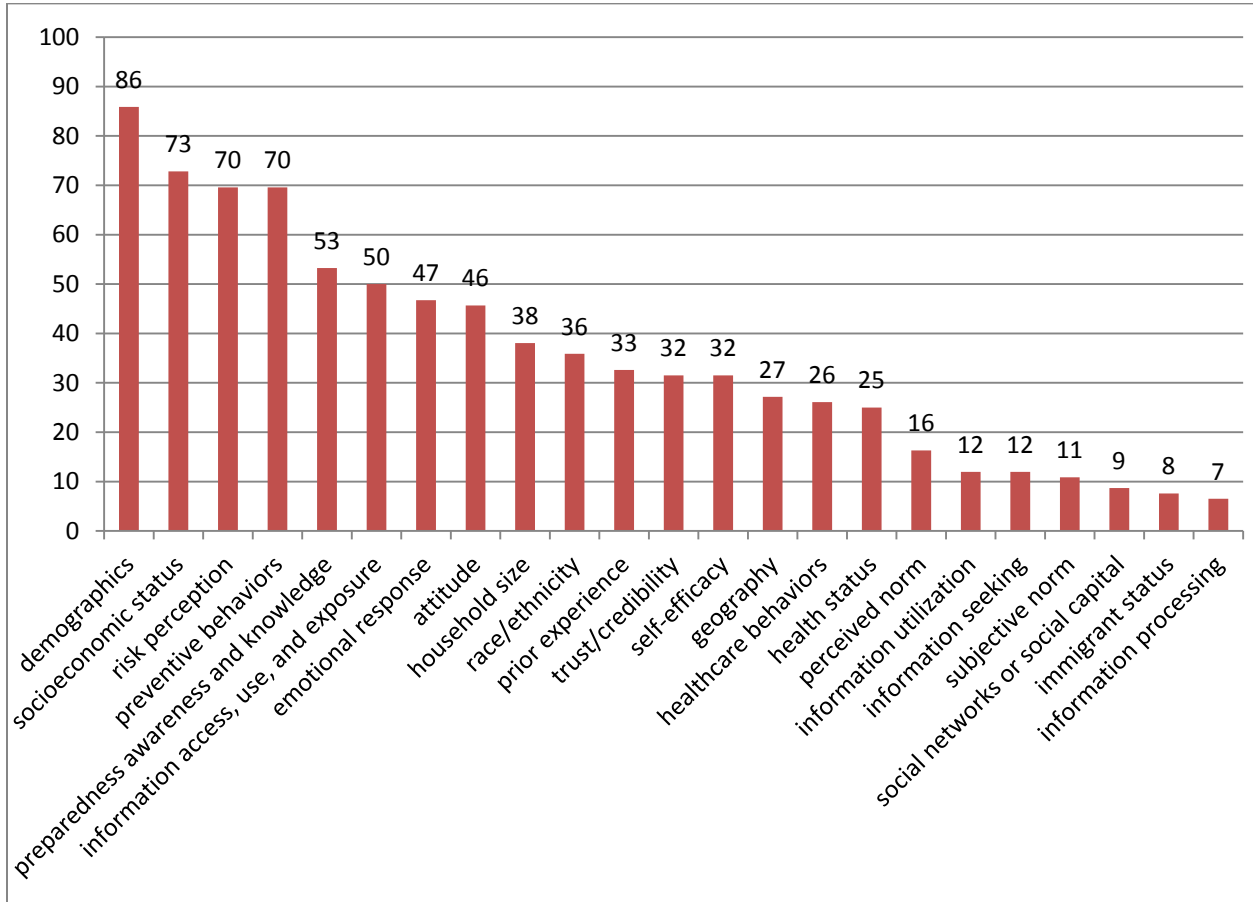

Supplement: MOESM6 [file 9498648]
